# Supplementary material for: Synthesis of Some Novel Nanosized Chelates of Anchoring Bisazo Dye 5-[5-(4,6-Dioxo-2-thioxo-hexahydro-pyrimidin-5-ylazo)-naphthalen-1-ylazo]-2-mercapto-1H-pyrimidine-4,6-dione and Their Applications as Antioxidant and Antitumor Agents
Source: PubMed Central journal article supplement — ACS Omega. 2021 Oct 15;6(42):27737–54. doi: 10.1021/acsomega.1c02989 (PMC8552356; doi:10.1021/acsomega.1c02989), 2021-10-15
Supplement: ao1c02989_si_001.pdf [file ao1c02989_si_001.pdf]

## Supporting Information

### **Synthesis of some novel nano sized chelates of anchoring bisazodye 5-[5-(4,6-Dioxo-2-thioxo-hexahydro-pyrimidin-5-ylazo)-naphthalen-1-ylazo]-2-mercapto-1H-pyrimidine-4,6-dione and their applications as antioxidant and antitumor agents**

Fatma I. Abouzayed<sup>a\*</sup>, Saeyda A. Abouel-Enein<sup>a</sup>, Amira M. Hammad<sup>b</sup>

<sup>a</sup> Chemistry Department, Faculty of Science, Menoufia University, Shebin El-Kom,  
Egypt

<sup>b</sup> Basic Science Department, Higher Institute of Engineering and Technology, Tanta,  
Egypt

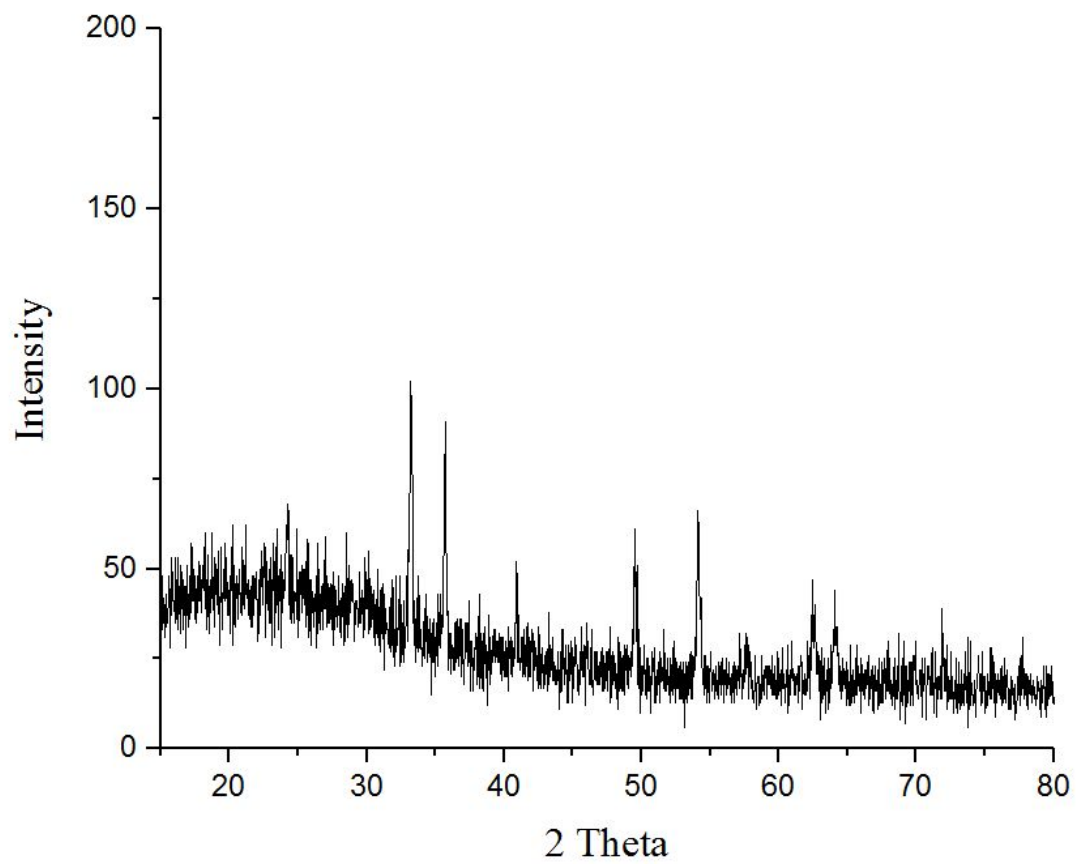

Figure S1. The XRD pattern for  $\text{Fe}_2\text{O}_3$  that resulted from the TG analysis of Fe(III) complex
